# Supplementary material
Source: PubMed Central journal article supplement (PMC7272166)
Supplement: mmc1.pdf [file mmc1.pdf]

# THE LANCET

## Gastroenterology & Hepatology

### Supplementary appendix

This appendix formed part of the original submission and has been peer reviewed. We post it as supplied by the authors.

Supplement to: Belli LS, Duvoux C, Karam V, et al. COVID-19 in liver transplant recipients: preliminary data from the ELITA/ELTR registry. *Lancet Gastroenterol Hepatol* 2020; published online June 4. [https://doi.org/10.1016/S2468-1253\(20\)30183-7](https://doi.org/10.1016/S2468-1253(20)30183-7).

|                                                  | Recipients (n=103) |
|--------------------------------------------------|--------------------|
| <b>Presenting symptoms</b>                       |                    |
| Fever                                            | 71/102 (70%)       |
| Cough                                            | 60/102 (59%)       |
| Polypnoea or dyspnoea                            | 35/102 (34%)       |
| Diarrhoea                                        | 24/102 (24%)       |
| Asthenia                                         | 20/102 (20%)       |
| Muscle pain                                      | 15/102 (15%)       |
| Anosmia or disgeusia                             | 9/102 (9%)         |
| Thoracic pain                                    | 7/102 (7%)         |
| Confusion                                        | 2/102 (2%)         |
| Others                                           | 6/102 (6%)         |
| <b>Co-morbidities</b>                            |                    |
| Overweight (>25 kg/m <sup>2</sup> )              | 49/88 (56%)        |
| Hypertension                                     | 52/101 (51%)       |
| Diabetes                                         | 41/101 (41%)       |
| Chronic renal impairment (creatinine >2 mg/dL)   | 15/101 (15%)       |
| History of smoking tobacco                       | 13/101 (13%)       |
| Coronary artery disease                          | 7/101 (7%)         |
| Others                                           | 12/101 (12%)       |
| <b>Treatment for COVID-19</b>                    |                    |
| Hydroxychloroquine                               | 63/95 (66%)        |
| Azythromycin                                     | 31/95 (33%)        |
| Lopinavir/ritonavir                              | 16/95 (17%)        |
| High-dose steroids                               | 17/95 (18%)        |
| Tocilizumab                                      | 7/95 (7%)          |
| <b>Mortality</b>                                 |                    |
| Overall                                          | 16/103 (16%)       |
| Among males                                      | 14/76 (18%)        |
| Among females                                    | 2/27 (7%)          |
| Among patients aged ≥60 years                    | 16/73 (22%)        |
| Among males aged ≥60 years                       | 14/59 (24%)        |
| Among patients aged ≤60 years                    | 0/27 (0%)          |
| Among patients on mechanical ventilation         | 4/9 (44%)          |
| Among those transplanted within the past 2 years | 1/21 (5%)          |
| Among those transplanted ≥2 years ago            | 15/82 (18%)        |

Data are n/N (%). Denominators vary because of missing data.

**Table 1: Data for the first 103 patients in the ELITA/ELTR COVID-19 registry**
